# Supplementary material for: Liquid thin film dewetting-driven micropatterning of reduced graphene oxide electrodes for high performance OFETs
Source: Royal Society of Chemistry journal article supplement (doi:10.1039/c8tc03981j), 2018-11-27
Supplement: c8tc03981j1.pdf [file c8tc03981j1.pdf]

**- Supplementary Information -**

Liquid thin film dewetting-driven micropatterning of  
reduced graphene oxide electrodes for high performance  
OFETs

*Sung Min Lee<sup>1</sup>, Seung Keun Song<sup>1</sup>, Seongwon Yoon<sup>2</sup>, Dae Sung Chung<sup>2\*</sup> and Suk Tai*

*Chang<sup>1\*</sup>*

<sup>1</sup>School of Chemical Engineering and Materials Science, Chung-Ang University,

Seoul 06974, Republic of Korea

<sup>2</sup>Department of Energy Science and Engineering, Daegu Gyeongbuk Institute of Science and

Technology (DGIST), Daegu 42988, Republic of Korea

\*E-mail: stchang@cau.ac.kr, dchung@dgist.ac.kr

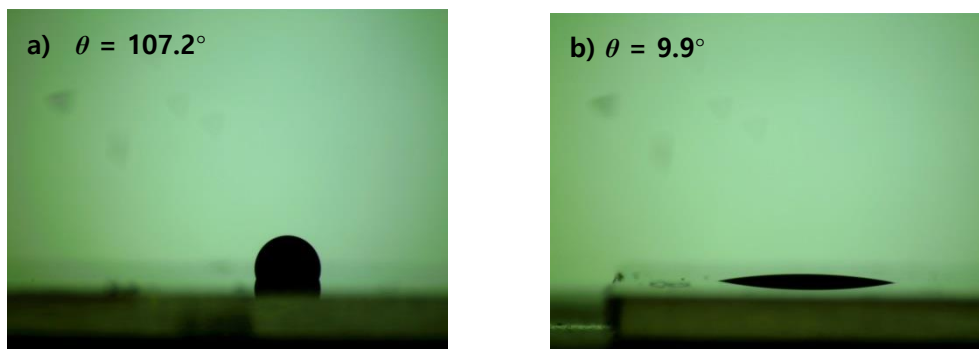

**Figure S1.** Contact angle ( $\theta$ ) of 6.65 mg/mL GO solution on (a) ODTS-treated substrate and (b) UV-O<sub>3</sub> treated substrate.

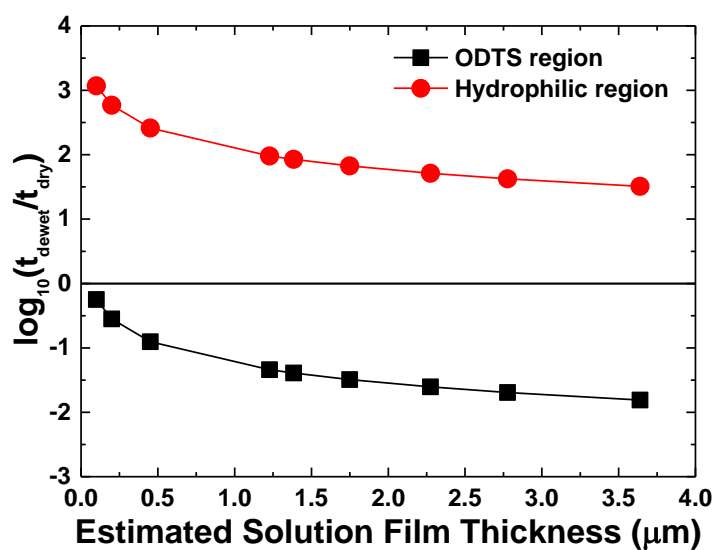

**Figure S2.** Relative time scale of dewetting and drying times ( $t_{\text{dewet}}/t_{\text{dry}}$ ) on hydrophilic and ODTS-treated regions as a function of the liquid thin film thickness estimated by equation (1).

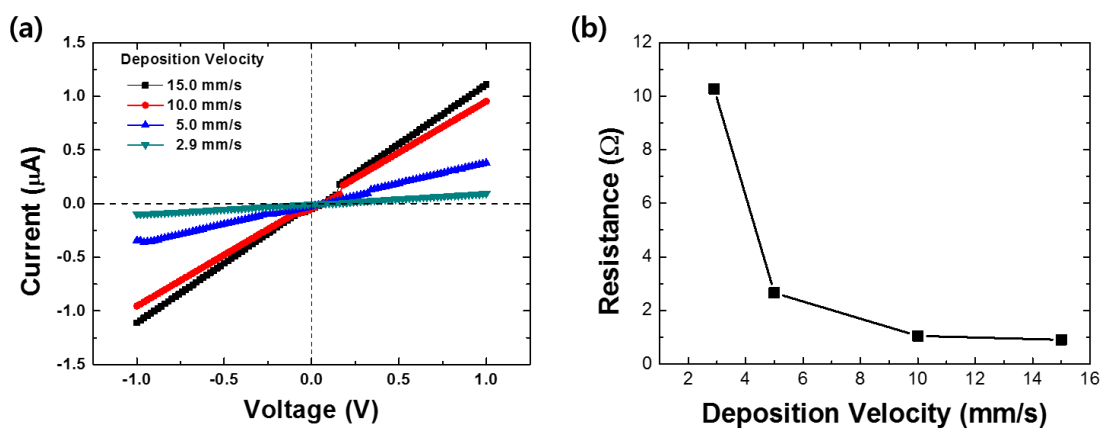

**Figure S3.** (a) I-V characteristic plot and (b) corresponding resistance profile of the rGO line patterns prepared with different deposition velocities in Figure 3b.
